# Supplementary material
Source: publisher figshare collection journal article supplement (https://sage.figshare.com/ndownloader/files/18037934)

**Appendix 4.** Observed (points) and predicted (lines) species richness and abundance as a function of tree surface (in  $\text{m}^2$ ) according to forest type: semi-deciduous forest (**SDF**), the tropical montane cloud forest (**TMCF**), the submontane scrub (**SMS**) and the pine-oak forest in the reserve (**POF**). The output is based on generalized linear models (GLMs) using poisson distribution and fitting the interaction between surface area and forest type.

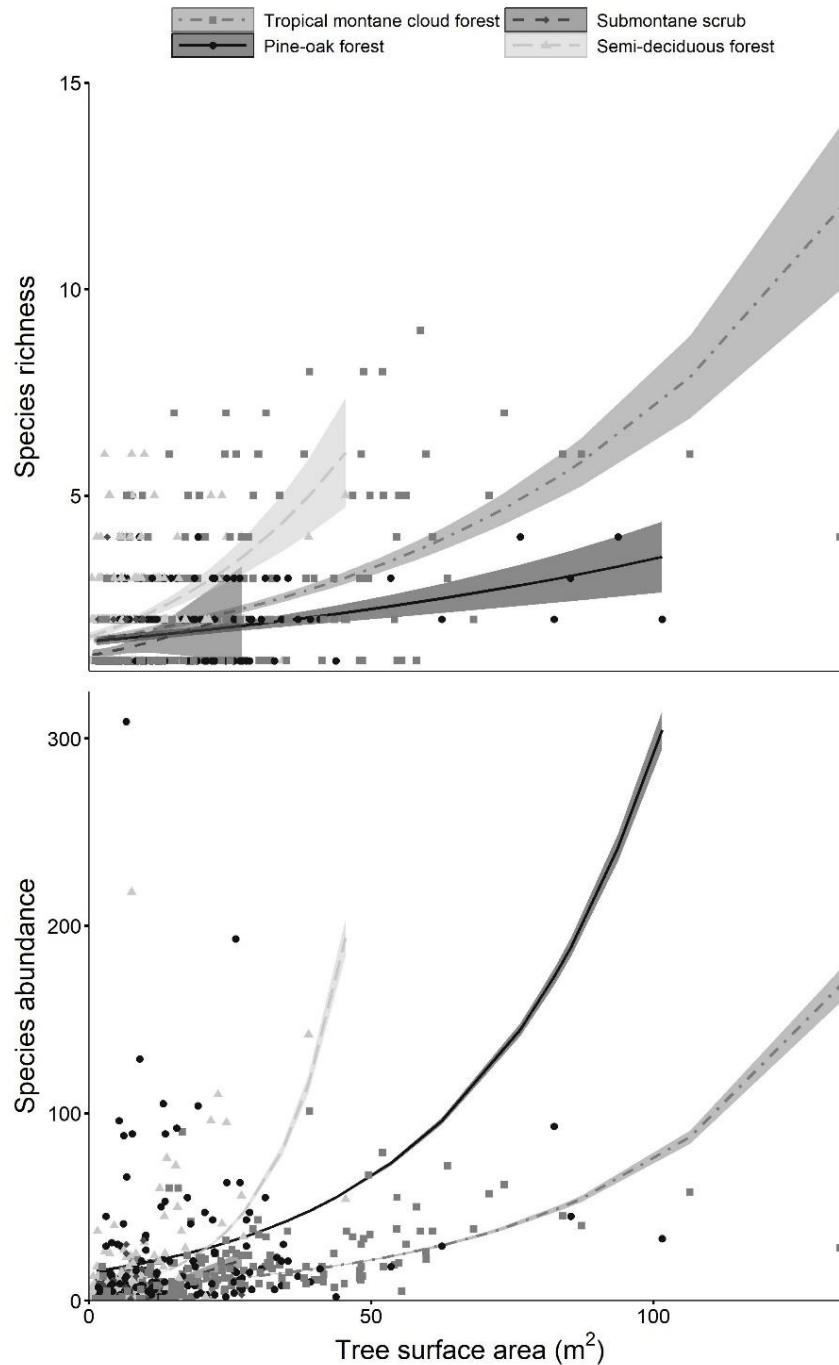

Supplement: Supplementary file 1 [file 18037934]
